# Supplementary material for: Denitrification by benthic foraminifera and their contribution to N-loss from a fjord environment
Source: Copernicus journal article supplement (doi:10.5194/bg-18-327-2021), 2021-01-15
Supplement: Supplementary file 1 [file bg-18-327-2021-supplement.pdf]

Supplement of Biogeosciences, 18, 327–341, 2021  
<https://doi.org/10.5194/bg-18-327-2021-supplement>  
© Author(s) 2021. This work is distributed under  
the Creative Commons Attribution 4.0 License.

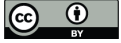

*Supplement of*

## **Denitrification by benthic foraminifera and their contribution to N-loss from a fjord environment**

**Constance Choquel et al.**

*Correspondence to:* Constance Choquel ([constance.choquel@gmail.com](mailto:constance.choquel@gmail.com)) and Emmanuelle Geslin ([emmanuelle.geslin@univ-angers.fr](mailto:emmanuelle.geslin@univ-angers.fr))

The copyright of individual parts of the supplement might differ from the CC BY 4.0 License.

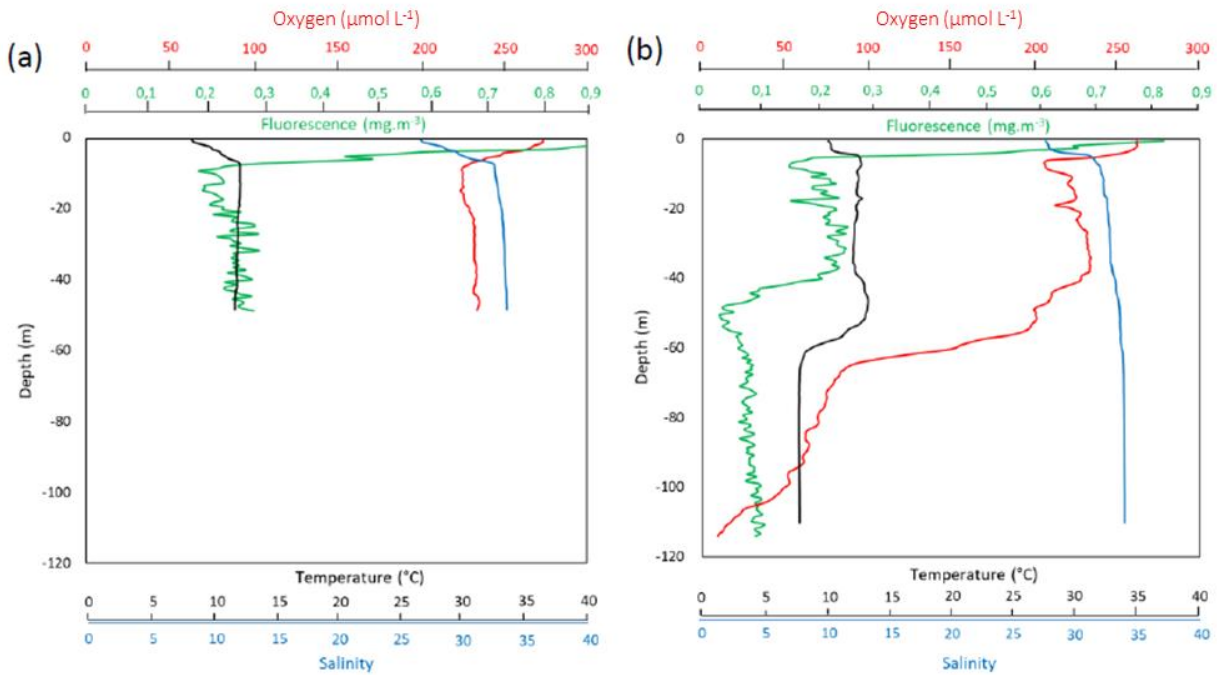

**Figure S1. CTD profiles of temperature, salinity, fluorescence and oxygen concentration in the water column of the both stations: (a) GF17-3 oxic station (50 m water depth) and (b) GF17-1 hypoxic station (near Alsbäck, 117 m water depth).**

**Equation S1. Detailed calculation for biovolume correction for the denitrification rate of the NIS *Nonionella* sp. T1 from the November 2017 cruise. Equation used according to Geslin et al. (2011) and Glock et al. (2019).**

$$\ln(\text{denitrification rate 2018 cruise}) * (0.68 * \ln(\text{BV 2017 cruise}) - 5.57) / (0.68 * \ln(\text{BV 2018 cruise}) - 5.57) = \ln(\text{corrected denitrification rate 2017 cruise})$$

$$\text{Example: } \ln(21) * (0.68 * \ln(1.3 \cdot 10^{+06}) - 5.57) / (0.68 * \ln(4.0 \cdot 10^{+06}) - 5.57) = \ln(38).$$

**Table S1: PROFILE software parameters used to generate the porewater nitrate modelling in both stations GF17-3 and GF17-1 in the Gullmar Fjord (see details in Berg et al., 1998).**

| PROFILE parameters                                                        | GF17-3                | GF17-1                |
|---------------------------------------------------------------------------|-----------------------|-----------------------|
| Depth at top of calculation domain (cm)                                   | 0                     | 0                     |
| Depth at bottom of calculation domain (cm)                                | 4.8                   | 4.8                   |
| Max number of equally spaced zones in interpretation (1 to 12)            | 8                     | 8                     |
| Type of boundary conditions (4:t=C b=F)                                   | 4                     | 4                     |
| First boundary condition ( $\mu\text{mol L}^{-1}$ )                       | 13.1                  | 4.2                   |
| Second boundary condition                                                 | 0                     | 0                     |
| Nitrate diffusion coefficient ( $\text{cm}^{-2} \text{s}^{-1}$ ) in water | $1.4 \cdot 10^{-05}$  | $1.4 \cdot 10^{-05}$  |
| Expression for sediment diffusivity (Ds)<br>(2: $D_s = F I^2 \cdot D$ )   | 2                     | 2                     |
| Concentration in water column ( $\mu\text{mol L}^{-1}$ )                  | 14.6                  | 5.7                   |
| Minimum for production rate                                               | $-1.0 \cdot 10^{+20}$ | $-1.0 \cdot 10^{+20}$ |
| Maximum for production rate                                               | $1.0 \cdot 10^{+20}$  | $1.0 \cdot 10^{+20}$  |
| Maximum deviation (in %) when accepting a calculated minimum              | 0.001                 | 0.001                 |
| Level of significance in the F statistics                                 | 0.01                  | 0.01                  |

**Table S2. Total densities (individuals per slice of 10 cm<sup>3</sup>) and relative abundances (%) of the foraminiferal fauna from the GF17-3A and 3C cores and from the GF17-1A and 1C cores of the Gullmar Fjord (GF). The cores were sliced every 2 mm from the SWI to 20 mm depth and every 5 mm from 20 to 50 mm depth. The foraminiferal sections are divided as: the NIS and potential invasive *Nonionella* sp. T1 species in the GF according to Polovodova Asteman and Schönfeld (2015) and Deldicq et al. (2019), the known denitrifying species in the GF according to Risgaard-Petersen et al. (2006) and Woehle et al. (2018), the non-denitrifying species according to Pina-Ochoa et al. (2010) and the minor other species of the fauna.**

| GF17-3A                                | Species                                                | 0-2 | 2-4 | 4-6 | 6-8 | 8-10 | 10-12 | 12-14 | 14-16 | 16-18 | 18-20 | 20-25 | 25-30 | 30-35 | 35-40 | 40-45 | 45-50 | Total density per species | Relative abundance (%) |
|----------------------------------------|--------------------------------------------------------|-----|-----|-----|-----|------|-------|-------|-------|-------|-------|-------|-------|-------|-------|-------|-------|---------------------------|------------------------|
| invasive species                       | <i>Nonionella</i> sp.T1 (Deldicq and al., 2019)        | 9   | 6   | 15  | 24  | 14   | 18    | 15    | 15    | 17    | 7     | 14    | 6     | 19    | 45    | 91    | 122   | 436                       | 34                     |
| known denitrifying species in GF       | <i>Globobulimina turgida</i> (Bailey)                  | 0   | 0   | 0   | 0   | 0    | 0     | 0     | 0     | 0     | 0     | 0     | 0     | 0     | 0     | 0     | 0     | 0                         | 0                      |
|                                        | <i>Globobulimina auricula</i> (Höglund)                | 0   | 0   | 0   | 0   | 0    | 0     | 0     | 0     | 0     | 0     | 0     | 0     | 0     | 0     | 0     | 0     | 0                         | 0                      |
| candidate denitrifying species         | <i>Bolivina pseudopunctata</i> (Höglund)               | 1   | 1   | 0   | 0   | 1    | 1     | 0     | 0     | 0     | 0     | 0     | 0     | 0     | 0     | 0     | 0     | 4                         | 0                      |
|                                        | <i>Stainforthia fusiformis</i> (Williamson)            | 2   | 0   | 0   | 1   | 3    | 1     | 0     | 0     | 2     | 0     | 1     | 0     | 0     | 0     | 0     | 0     | 10                        | 1                      |
| non-denitrifying species               | <i>Bulimina marginata</i> (d'Orbigny)                  | 22  | 48  | 37  | 32  | 30   | 35    | 12    | 14    | 26    | 26    | 15    | 6     | 25    | 26    | 73    | 43    | 471                       | 37                     |
|                                        | <i>Cassidulina laevigata</i> (d'Orbigny)               | 10  | 41  | 4   | 19  | 9    | 2     | 2     | 24    | 3     | 1     | 0     | 0     | 0     | 0     | 0     | 0     | 114                       | 9                      |
|                                        | <i>Leptohalysis scotti</i> (Chaster)                   | 2   | 1   | 6   | 6   | 4    | 9     | 9     | 6     | 17    | 29    | 13    | 8     | 6     | 5     | 5     | 9     | 134                       | 11                     |
| minor other species                    | <i>Ammonia falsobecchari</i> (Rouvillois)              | 0   | 0   | 0   | 0   | 0    | 0     | 1     | 0     | 1     | 0     | 0     | 0     | 1     | 0     | 0     | 0     | 3                         | 0                      |
|                                        | <i>Bolivina skagerrakensis</i> (Qvale and Nigam)       | 0   | 0   | 3   | 0   | 0    | 0     | 0     | 0     | 3     | 0     | 0     | 0     | 0     | 0     | 0     | 0     | 6                         | 1                      |
|                                        | <i>Bolivina spathulata</i> (Williamson)                | 0   | 0   | 0   | 0   | 0    | 0     | 0     | 0     | 0     | 0     | 0     | 0     | 0     | 0     | 0     | 0     | 0                         | 0                      |
|                                        | <i>Bolivina</i> sp.                                    | 0   | 0   | 0   | 0   | 0    | 0     | 0     | 0     | 0     | 0     | 0     | 0     | 0     | 0     | 0     | 0     | 0                         | 0                      |
|                                        | <i>Cribrostomoides nitida</i> (Goës)                   | 0   | 0   | 0   | 0   | 0    | 0     | 0     | 0     | 0     | 0     | 0     | 0     | 0     | 0     | 0     | 0     | 0                         | 0                      |
|                                        | <i>Eggerella scabra</i> (Williamson)                   | 0   | 0   | 0   | 0   | 0    | 0     | 0     | 0     | 0     | 0     | 0     | 0     | 0     | 0     | 0     | 0     | 0                         | 0                      |
|                                        | <i>Elphidium clavatum-selseyensis</i> (d'Orbigny)      | 0   | 0   | 0   | 1   | 0    | 0     | 0     | 0     | 0     | 0     | 0     | 0     | 0     | 0     | 0     | 0     | 1                         | 0                      |
|                                        | <i>Hyalinea balthica</i> (Schroeter)                   | 0   | 0   | 0   | 0   | 0    | 0     | 0     | 1     | 0     | 0     | 0     | 0     | 0     | 0     | 0     | 0     | 1                         | 0                      |
|                                        | <i>Lenticulina</i> sp.                                 | 0   | 0   | 0   | 0   | 0    | 0     | 0     | 0     | 0     | 0     | 0     | 0     | 0     | 0     | 0     | 0     | 0                         | 0                      |
|                                        | <i>Liebusella goesi</i> (Höglund)                      | 0   | 0   | 0   | 0   | 0    | 0     | 0     | 0     | 0     | 0     | 0     | 0     | 0     | 0     | 0     | 0     | 0                         | 0                      |
|                                        | <i>Nonionella labradorica</i> (Dawson)                 | 0   | 0   | 4   | 0   | 3    | 0     | 0     | 0     | 0     | 3     | 0     | 0     | 0     | 0     | 0     | 0     | 10                        | 1                      |
|                                        | <i>Nonionella turgida</i> (Williamson)                 | 1   | 0   | 1   | 1   | 6    | 9     | 0     | 0     | 0     | 0     | 2     | 0     | 0     | 0     | 0     | 0     | 20                        | 2                      |
|                                        | <i>Pyrgo williamsoni</i> (Silvestry)                   | 4   | 9   | 0   | 5   | 1    | 0     | 0     | 0     | 0     | 0     | 0     | 0     | 0     | 0     | 0     | 0     | 19                        | 2                      |
|                                        | <i>Quinqueloculina bosciana</i> (d'Orbigny)            | 0   | 0   | 0   | 1   | 1    | 0     | 0     | 0     | 0     | 0     | 0     | 0     | 0     | 0     | 0     | 0     | 2                         | 0                      |
|                                        | <i>Quinqueloculina seminulum</i> (Linné)               | 1   | 5   | 0   | 0   | 1    | 0     | 0     | 0     | 0     | 0     | 0     | 0     | 0     | 0     | 0     | 0     | 7                         | 1                      |
|                                        | <i>Quinqueloculina stalkerii</i> (Loeblich and Tappan) | 1   | 0   | 0   | 0   | 0    | 0     | 0     | 0     | 0     | 0     | 0     | 0     | 0     | 0     | 0     | 0     | 1                         | 0                      |
|                                        | <i>Reophax subfusiformis</i> (Earland)                 | 0   | 0   | 0   | 0   | 0    | 0     | 0     | 0     | 0     | 0     | 0     | 0     | 0     | 0     | 0     | 0     | 0                         | 0                      |
|                                        | <i>Scutolons</i> sp.                                   | 0   | 0   | 0   | 0   | 0    | 0     | 0     | 0     | 0     | 0     | 0     | 0     | 0     | 0     | 0     | 0     | 0                         | 0                      |
|                                        | <i>Stainforthia loeblichii</i> (Feyling-Hanssen)       | 1   | 0   | 3   | 2   | 1    | 0     | 0     | 2     | 0     | 1     | 0     | 0     | 0     | 0     | 0     | 0     | 11                        | 1                      |
|                                        | <i>Textularia earlandi</i> (Parker)                    | 0   | 0   | 0   | 0   | 0    | 0     | 0     | 0     | 0     | 0     | 0     | 0     | 0     | 0     | 0     | 0     | 0                         | 0                      |
| <i>Textularia sagittula</i> (Defrance) | 0                                                      | 0   | 0   | 0   | 0   | 0    | 0     | 0     | 0     | 0     | 0     | 0     | 0     | 0     | 0     | 0     | 0     | 0                         |                        |
| other species                          |                                                        | 0   | 0   | 1   | 2   | 0    | 0     | 0     | 1     | 0     | 2     | 0     | 1     | 0     | 1     | 0     | 0     | 7                         | 1                      |
|                                        | Total density per slice                                | 53  | 111 | 73  | 93  | 73   | 75    | 40    | 63    | 68    | 68    | 45    | 22    | 52    | 77    | 170   | 175   | 1256                      | 100                    |

| GF17-3C                                | Species                                              | 0-2 | 2-4 | 4-6 | 6-8 | 8-10 | 10-12 | 12-14 | 14-16 | 16-18 | 18-20 | 20-25 | 25-30 | 30-35 | 35-40 | 40-45 | 45-50 | Total density per species | Relative abundance (%) |
|----------------------------------------|------------------------------------------------------|-----|-----|-----|-----|------|-------|-------|-------|-------|-------|-------|-------|-------|-------|-------|-------|---------------------------|------------------------|
| invasive species                       | <i>Nonionella</i> sp.T1 (Deldicq and al., 2019)      | 17  | 45  | 34  | 82  | 63   | 35    | 41    | 25    | 56    | 51    | 56    | 98    | 145   | 140   | 89    | 88    | 1063                      | 74                     |
| known denitrifying species in GF       | <i>Globobulimina turgida</i> (Bailey)                | 0   | 0   | 0   | 0   | 0    | 0     | 0     | 0     | 0     | 0     | 0     | 0     | 0     | 0     | 0     | 0     | 0                         | 0                      |
|                                        | <i>Globobulimina auricula</i> (Höglund)              | 0   | 0   | 0   | 0   | 0    | 0     | 0     | 0     | 0     | 0     | 0     | 0     | 0     | 0     | 0     | 0     | 0                         | 0                      |
| candidate denitrifying species         | <i>Bolivina pseudopunctata</i> (Höglund)             | 0   | 0   | 0   | 0   | 0    | 0     | 0     | 0     | 0     | 0     | 0     | 0     | 0     | 0     | 0     | 0     | 0                         | 0                      |
|                                        | <i>Stainforthia fusiformis</i> (Williamson)          | 0   | 2   | 2   | 0   | 2    | 1     | 0     | 0     | 1     | 0     | 0     | 0     | 0     | 0     | 0     | 0     | 8                         | 1                      |
| non-denitrifying species               | <i>Bulimina marginata</i> (d'Orbigny)                | 18  | 9   | 9   | 16  | 11   | 2     | 2     | 2     | 1     | 2     | 0     | 0     | 1     | 0     | 0     | 1     | 75                        | 5                      |
|                                        | <i>Cassidulina laevigata</i> (d'Orbigny)             | 15  | 14  | 15  | 12  | 9    | 5     | 9     | 0     | 0     | 0     | 0     | 0     | 0     | 0     | 0     | 0     | 79                        | 5                      |
|                                        | <i>Leptohalysis scotti</i> (Chaster)                 | 15  | 9   | 8   | 16  | 7    | 7     | 12    | 5     | 21    | 11    | 9     | 3     | 2     | 1     | 3     | 0     | 128                       | 9                      |
| minor other species                    | <i>Ammonia falsobecarii</i> (Rouvilleis)             | 0   | 0   | 0   | 0   | 0    | 0     | 0     | 0     | 0     | 0     | 0     | 0     | 0     | 0     | 0     | 0     | 0                         | 0                      |
|                                        | <i>Bolivina skagerrakensis</i> (Qvale and Nigam)     | 1   | 3   | 3   | 0   | 0    | 0     | 0     | 0     | 0     | 0     | 0     | 0     | 0     | 0     | 0     | 0     | 7                         | 0                      |
|                                        | <i>Bolivina spathulata</i> (Williamson)              | 0   | 0   | 0   | 0   | 0    | 0     | 0     | 0     | 0     | 0     | 0     | 0     | 0     | 0     | 0     | 0     | 0                         | 0                      |
|                                        | <i>Bolivina</i> sp.                                  | 0   | 0   | 0   | 0   | 0    | 0     | 0     | 0     | 0     | 0     | 0     | 0     | 0     | 0     | 0     | 0     | 0                         | 0                      |
|                                        | <i>Cribrostomoides nitida</i> (Goës)                 | 0   | 0   | 0   | 0   | 0    | 0     | 0     | 0     | 0     | 0     | 0     | 0     | 0     | 0     | 0     | 0     | 0                         | 0                      |
|                                        | <i>Eggerella scabra</i> (Williamson)                 | 4   | 0   | 0   | 0   | 0    | 0     | 0     | 0     | 0     | 0     | 0     | 0     | 0     | 0     | 0     | 0     | 4                         | 0                      |
|                                        | <i>Elphidium clavatum-selseyensis</i> (d'Orbigny)    | 0   | 2   | 0   | 0   | 0    | 0     | 0     | 0     | 0     | 0     | 0     | 0     | 0     | 0     | 0     | 0     | 2                         | 0                      |
|                                        | <i>Hyalinea balthica</i> (Schroeter)                 | 0   | 0   | 0   | 0   | 0    | 0     | 0     | 0     | 0     | 0     | 0     | 0     | 0     | 0     | 0     | 0     | 0                         | 0                      |
|                                        | <i>Lenticulina</i> sp.                               | 0   | 0   | 0   | 0   | 0    | 0     | 0     | 0     | 0     | 0     | 0     | 0     | 0     | 0     | 0     | 0     | 0                         | 0                      |
|                                        | <i>Liebusella goesi</i> (Höglund)                    | 0   | 0   | 0   | 0   | 0    | 0     | 0     | 0     | 0     | 0     | 0     | 0     | 0     | 0     | 0     | 0     | 0                         | 0                      |
|                                        | <i>Nonionella labradorica</i> (Dawson)               | 0   | 5   | 1   | 3   | 0    | 4     | 1     | 7     | 7     | 4     | 1     | 0     | 0     | 0     | 0     | 0     | 31                        | 2                      |
|                                        | <i>Nonionella turgida</i> (Williamson)               | 0   | 0   | 0   | 0   | 0    | 0     | 0     | 0     | 0     | 0     | 0     | 0     | 0     | 0     | 0     | 0     | 0                         | 0                      |
|                                        | <i>Pyrgo williamsoni</i> (Silvestry)                 | 0   | 2   | 0   | 0   | 0    | 1     | 0     | 0     | 0     | 0     | 0     | 0     | 0     | 0     | 0     | 0     | 3                         | 0                      |
|                                        | <i>Quinqueloculina boschiana</i> (d'Orbigny)         | 0   | 0   | 0   | 0   | 0    | 0     | 0     | 0     | 0     | 0     | 0     | 0     | 0     | 0     | 0     | 0     | 0                         | 0                      |
|                                        | <i>Quinqueloculina seminulum</i> (Linné)             | 3   | 2   | 0   | 3   | 0    | 0     | 0     | 0     | 0     | 0     | 0     | 0     | 0     | 0     | 0     | 0     | 8                         | 1                      |
|                                        | <i>Quinqueloculina stalker</i> (Loeblich and Tappan) | 0   | 0   | 0   | 0   | 0    | 0     | 0     | 0     | 0     | 0     | 0     | 0     | 0     | 0     | 0     | 0     | 0                         | 0                      |
|                                        | <i>Reophax subfusiformis</i> (Earland)               | 0   | 0   | 0   | 0   | 0    | 0     | 0     | 0     | 0     | 0     | 0     | 0     | 0     | 0     | 0     | 0     | 0                         | 0                      |
|                                        | <i>Scutulons</i> sp.                                 | 0   | 0   | 0   | 0   | 0    | 0     | 0     | 0     | 0     | 0     | 0     | 0     | 0     | 0     | 0     | 0     | 0                         | 0                      |
|                                        | <i>Stainforthia loeblichi</i> (Feyling-Hanssen)      | 0   | 0   | 1   | 0   | 0    | 0     | 1     | 0     | 0     | 0     | 0     | 0     | 0     | 0     | 0     | 0     | 2                         | 0                      |
|                                        | <i>Textularia earlandi</i> (Parker)                  | 1   | 0   | 1   | 0   | 0    | 0     | 0     | 0     | 0     | 0     | 0     | 0     | 0     | 0     | 0     | 0     | 2                         | 0                      |
| <i>Textularia sagittula</i> (Defrance) | 6                                                    | 7   | 1   | 2   | 0   | 3    | 0     | 0     | 0     | 0     | 0     | 0     | 0     | 0     | 0     | 0     | 18    | 1                         |                        |
| other species                          | 0                                                    | 0   | 0   | 0   | 0   | 0    | 0     | 0     | 0     | 0     | 0     | 0     | 0     | 0     | 0     | 0     | 0     | 0                         |                        |
|                                        | Total density per slice                              | 80  | 98  | 74  | 134 | 91   | 57    | 65    | 38    | 85    | 68    | 66    | 101   | 148   | 141   | 92    | 88    | 1428                      | 100                    |

| GF17-1A                                | Species                                                | 0-2 | 2-4 | 4-6 | 6-8 | 8-10 | 10-12 | 12-14 | 14-16 | 16-18 | 18-20 | 20-25 | 25-30 | 30-35 | 35-40 | 40-45 | 45-50 | Total density per species | Relative abundance (%) |
|----------------------------------------|--------------------------------------------------------|-----|-----|-----|-----|------|-------|-------|-------|-------|-------|-------|-------|-------|-------|-------|-------|---------------------------|------------------------|
| invasive species                       | <i>Nonionella</i> sp.T1 (Deldicq and al., 2019)        | 0   | 1   | 0   | 1   | 1    | 0     | 0     | 9     | 15    | 19    | 21    | 2     | 2     | 3     | 1     | 1     | 74                        | 5                      |
| known denitrifying species in GF       | <i>Globobulimina turgida</i> (Bailey)                  | 0   | 1   | 1   | 0   | 0    | 0     | 0     | 1     | 0     | 1     | 0     | 0     | 0     | 1     | 0     | 0     | 5                         | 0                      |
|                                        | <i>Globobulimina auricula</i> (Höglund)                | 0   | 0   | 1   | 0   | 0    | 0     | 1     | 0     | 1     | 0     | 1     | 2     | 0     | 0     | 1     | 2     | 8                         | 1                      |
| candidate denitrifying species         | <i>Bolivina pseudopunctata</i> (Höglund)               | 1   | 1   | 0   | 0   | 0    | 0     | 0     | 0     | 0     | 0     | 0     | 0     | 0     | 0     | 0     | 0     | 2                         | 0                      |
|                                        | <i>Stainforthia fusiformis</i> (Williamson)            | 8   | 4   | 13  | 3   | 1    | 5     | 0     | 0     | 0     | 2     | 0     | 1     | 1     | 1     | 3     | 2     | 43                        | 3                      |
| non-denitrifying species               | <i>Bulimina marginata</i> (d'Orbigny)                  | 83  | 130 | 165 | 63  | 115  | 112   | 51    | 36    | 32    | 38    | 23    | 19    | 16    | 14    | 24    | 17    | 937                       | 64                     |
|                                        | <i>Cassidulina laevigata</i> (d'Orbigny)               | 27  | 47  | 46  | 13  | 30   | 12    | 38    | 4     | 4     | 5     | 2     | 2     | 1     | 0     | 2     | 1     | 234                       | 16                     |
|                                        | <i>Leptohalysis scotti</i> (Chaster)                   | 19  | 10  | 6   | 3   | 5    | 2     | 4     | 0     | 0     | 2     | 5     | 0     | 3     | 4     | 1     | 1     | 65                        | 4                      |
| minor other species                    | <i>Ammonia falsobecconi</i> (Rouvilleis)               | 0   | 0   | 0   | 0   | 0    | 0     | 0     | 0     | 1     | 0     | 0     | 0     | 0     | 0     | 0     | 0     | 1                         | 0                      |
|                                        | <i>Bolivina skagerrakensis</i> (Qvale and Nigam)       | 0   | 0   | 5   | 1   | 0    | 1     | 0     | 0     | 0     | 1     | 0     | 0     | 0     | 0     | 0     | 0     | 8                         | 1                      |
|                                        | <i>Bolivina spathulata</i> (Williamson)                | 0   | 0   | 0   | 0   | 0    | 0     | 0     | 0     | 0     | 0     | 0     | 0     | 0     | 0     | 0     | 0     | 0                         | 0                      |
|                                        | <i>Bolivina</i> sp.                                    | 0   | 0   | 0   | 0   | 1    | 0     | 0     | 0     | 0     | 0     | 0     | 0     | 0     | 0     | 0     | 0     | 1                         | 0                      |
|                                        | <i>Cribrostomoides nitida</i> (Goës)                   | 0   | 0   | 0   | 0   | 0    | 0     | 0     | 0     | 0     | 0     | 0     | 0     | 0     | 0     | 0     | 0     | 0                         | 0                      |
|                                        | <i>Eggerella scabra</i> (Williamson)                   | 0   | 0   | 0   | 0   | 0    | 0     | 0     | 0     | 0     | 0     | 0     | 0     | 0     | 0     | 0     | 0     | 0                         | 0                      |
|                                        | <i>Elphidium clavatum-selseyensis</i> (d'Orbigny)      | 0   | 1   | 1   | 0   | 0    | 1     | 1     | 0     | 0     | 0     | 1     | 0     | 0     | 0     | 0     | 1     | 6                         | 0                      |
|                                        | <i>Hyalinea balthica</i> (Schroeter)                   | 1   | 4   | 2   | 1   | 1    | 0     | 1     | 0     | 0     | 0     | 0     | 0     | 0     | 0     | 0     | 0     | 11                        | 1                      |
|                                        | <i>Lenticulina</i> sp.                                 | 0   | 0   | 0   | 0   | 0    | 0     | 0     | 0     | 0     | 0     | 0     | 0     | 0     | 0     | 0     | 0     | 0                         | 0                      |
|                                        | <i>Liebusella goesi</i> (Höglund)                      | 0   | 0   | 0   | 0   | 0    | 0     | 0     | 0     | 0     | 0     | 0     | 0     | 0     | 0     | 0     | 0     | 0                         | 0                      |
|                                        | <i>Nonionella labradorica</i> (Dawson)                 | 2   | 2   | 2   | 0   | 0    | 7     | 3     | 4     | 0     | 0     | 2     | 0     | 0     | 0     | 0     | 0     | 20                        | 1                      |
|                                        | <i>Nonionella turgida</i> (Williamson)                 | 0   | 0   | 1   | 0   | 1    | 0     | 1     | 2     | 2     | 6     | 2     | 0     | 0     | 0     | 0     | 0     | 15                        | 1                      |
|                                        | <i>Pyrgo williamsoni</i> (Silvestry)                   | 0   | 1   | 0   | 0   | 0    | 0     | 0     | 0     | 0     | 0     | 1     | 2     | 0     | 0     | 0     | 0     | 4                         | 0                      |
|                                        | <i>Quinqueloculina boschiana</i> (d'Orbigny)           | 0   | 0   | 0   | 0   | 0    | 0     | 0     | 0     | 0     | 0     | 0     | 0     | 0     | 0     | 0     | 0     | 0                         | 0                      |
|                                        | <i>Quinqueloculina seminulum</i> (Linné)               | 3   | 2   | 7   | 1   | 2    | 0     | 0     | 1     | 0     | 0     | 0     | 0     | 0     | 0     | 0     | 0     | 16                        | 1                      |
|                                        | <i>Quinqueloculina stalkerii</i> (Loeblich and Tappan) | 0   | 0   | 0   | 0   | 0    | 0     | 0     | 0     | 0     | 0     | 0     | 0     | 0     | 0     | 0     | 0     | 0                         | 0                      |
|                                        | <i>Reophax subfusiformis</i> (Earland)                 | 0   | 1   | 0   | 0   | 0    | 0     | 0     | 0     | 0     | 0     | 0     | 0     | 0     | 0     | 0     | 0     | 1                         | 0                      |
|                                        | <i>Scutulons</i> sp.                                   | 0   | 0   | 0   | 0   | 0    | 0     | 0     | 0     | 0     | 0     | 0     | 0     | 0     | 0     | 0     | 0     | 0                         | 0                      |
|                                        | <i>Stainforthia loeblichii</i> (Feyling-Hanssen)       | 0   | 3   | 0   | 0   | 0    | 0     | 0     | 0     | 0     | 0     | 0     | 0     | 0     | 0     | 0     | 0     | 3                         | 0                      |
|                                        | <i>Textularia earlandi</i> (Parker)                    | 0   | 0   | 0   | 0   | 0    | 0     | 0     | 0     | 0     | 0     | 0     | 0     | 0     | 0     | 0     | 0     | 0                         | 0                      |
| <i>Textularia sagittula</i> (Defrance) | 0                                                      | 0   | 0   | 0   | 0   | 0    | 0     | 0     | 0     | 0     | 0     | 0     | 0     | 0     | 0     | 0     | 0     | 0                         |                        |
| other species                          |                                                        | 0   | 0   | 0   | 1   | 0    | 0     | 0     | 0     | 0     | 0     | 0     | 0     | 0     | 0     | 0     | 0     | 1                         | 0                      |
|                                        | Total density per slice                                | 143 | 207 | 249 | 86  | 156  | 139   | 99    | 56    | 55    | 73    | 59    | 27    | 24    | 24    | 33    | 26    | 1457                      | 100                    |

| GF17-1C                                | Species                                                | 0-2 | 2-4 | 4-6 | 6-8 | 8-10 | 10-12 | 12-14 | 14-16 | 16-18 | 18-20 | 20-25 | 25-30 | 30-35 | 35-40 | 40-45 | 45-50 | Total density per species | Relative abundance (%) |
|----------------------------------------|--------------------------------------------------------|-----|-----|-----|-----|------|-------|-------|-------|-------|-------|-------|-------|-------|-------|-------|-------|---------------------------|------------------------|
| invasive species                       | <i>Nonionella</i> sp.T1 (Deldicq and al., 2019)        | 2   | 1   | 0   | 0   | 0    | 0     | 0     | 0     | 1     | 0     | 0     | 0     | 0     | 0     | 0     | 0     | 4                         | 1                      |
| known denitrifying species in GF       | <i>Globobulimina turgida</i> (Bailey)                  | 0   | 0   | 0   | 0   | 0    | 0     | 0     | 0     | 0     | 0     | 0     | 0     | 0     | 0     | 0     | 0     | 0                         | 0                      |
|                                        | <i>Globobulimina auricula</i> (Höglund)                | 0   | 0   | 0   | 0   | 0    | 0     | 0     | 11    | 1     | 1     | 1     | 0     | 0     | 0     | 0     | 0     | 14                        | 2                      |
| candidate denitrifying species         | <i>Bolivina pseudopunctata</i> (Höglund)               | 2   | 1   | 1   | 1   | 1    | 1     | 5     | 2     | 1     | 4     | 0     | 0     | 0     | 0     | 0     | 0     | 18                        | 2                      |
|                                        | <i>Stainforthia fusiformis</i> (Williamson)            | 11  | 8   | 0   | 0   | 0    | 0     | 1     | 1     | 1     | 0     | 1     | 0     | 0     | 0     | 0     | 0     | 23                        | 3                      |
| non-denitrifying species               | <i>Bulimina marginata</i> (d'Orbigny)                  | 31  | 38  | 66  | 17  | 31   | 9     | 11    | 12    | 12    | 1     | 3     | 1     | 2     | 2     | 2     | 4     | 244                       | 30                     |
|                                        | <i>Cassidulina laevigata</i> (d'Orbigny)               | 9   | 24  | 26  | 20  | 11   | 7     | 5     | 9     | 6     | 3     | 0     | 0     | 0     | 0     | 0     | 0     | 119                       | 15                     |
|                                        | <i>Leptohalysis scotti</i> (Chaster)                   | 21  | 12  | 17  | 8   | 17   | 14    | 17    | 18    | 35    | 31    | 18    | 18    | 6     | 17    | 24    | 19    | 293                       | 36                     |
| minor other species                    | <i>Ammonia falsobecconi</i> (Rouvilleis)               | 0   | 0   | 0   | 0   | 0    | 0     | 0     | 0     | 0     | 0     | 0     | 0     | 0     | 0     | 0     | 0     | 0                         | 0                      |
|                                        | <i>Bolivina skagerrakensis</i> (Qvale and Nigam)       | 0   | 0   | 0   | 0   | 0    | 0     | 0     | 0     | 0     | 0     | 0     | 0     | 0     | 0     | 0     | 0     | 0                         | 0                      |
|                                        | <i>Bolivina spathulata</i> (Williamson)                | 0   | 2   | 2   | 0   | 0    | 1     | 0     | 0     | 0     | 0     | 0     | 0     | 0     | 0     | 0     | 0     | 5                         | 1                      |
|                                        | <i>Bolivina</i> sp.                                    | 0   | 2   | 0   | 0   | 0    | 0     | 0     | 0     | 0     | 0     | 0     | 0     | 0     | 0     | 0     | 0     | 2                         | 0                      |
|                                        | <i>Cribrostomoides nitida</i> (Goës)                   | 0   | 0   | 0   | 0   | 0    | 0     | 0     | 0     | 0     | 0     | 0     | 0     | 0     | 0     | 0     | 0     | 0                         | 0                      |
|                                        | <i>Eggerella scabra</i> (Williamson)                   | 0   | 0   | 0   | 0   | 0    | 0     | 0     | 0     | 0     | 0     | 0     | 0     | 0     | 0     | 0     | 0     | 0                         | 0                      |
|                                        | <i>Elphidium clavatum-selseyensis</i> (d'Orbigny)      | 0   | 0   | 0   | 0   | 0    | 0     | 0     | 0     | 0     | 0     | 0     | 0     | 0     | 0     | 0     | 0     | 1                         | 0                      |
|                                        | <i>Hyalinea balthica</i> (Schroeter)                   | 1   | 0   | 0   | 0   | 0    | 0     | 0     | 2     | 0     | 0     | 0     | 0     | 0     | 0     | 0     | 0     | 3                         | 0                      |
|                                        | <i>Lenticulina</i> sp.                                 | 0   | 2   | 0   | 0   | 1    | 0     | 0     | 0     | 0     | 0     | 0     | 0     | 0     | 0     | 0     | 0     | 3                         | 0                      |
|                                        | <i>Liebusella goesi</i> (Höglund)                      | 0   | 0   | 0   | 0   | 0    | 0     | 0     | 0     | 0     | 0     | 0     | 0     | 0     | 0     | 0     | 0     | 0                         | 0                      |
|                                        | <i>Nonionella labradorica</i> (Dawson)                 | 1   | 0   | 1   | 0   | 0    | 2     | 0     | 0     | 3     | 0     | 0     | 0     | 0     | 0     | 0     | 0     | 7                         | 1                      |
|                                        | <i>Nonionella turgida</i> (Williamson)                 | 0   | 0   | 0   | 0   | 0    | 0     | 0     | 0     | 0     | 1     | 3     | 0     | 0     | 0     | 0     | 0     | 4                         | 0                      |
|                                        | <i>Pyrgo williamsoni</i> (Silvestry)                   | 2   | 2   | 6   | 1   | 2    | 1     | 1     | 5     | 3     | 1     | 0     | 0     | 0     | 0     | 0     | 0     | 24                        | 3                      |
|                                        | <i>Quinqueloculina boschiana</i> (d'Orbigny)           | 0   | 0   | 2   | 0   | 0    | 0     | 0     | 0     | 0     | 0     | 0     | 0     | 0     | 0     | 0     | 0     | 2                         | 0                      |
|                                        | <i>Quinqueloculina seminulum</i> (Linné)               | 3   | 3   | 1   | 0   | 0    | 1     | 0     | 0     | 0     | 0     | 0     | 0     | 0     | 0     | 0     | 0     | 8                         | 1                      |
|                                        | <i>Quinqueloculina stalkerii</i> (Loeblich and Tappan) | 0   | 0   | 0   | 0   | 0    | 0     | 0     | 0     | 0     | 0     | 0     | 0     | 0     | 0     | 0     | 0     | 0                         | 0                      |
|                                        | <i>Reophax subfusiformis</i> (Earland)                 | 1   | 0   | 0   | 0   | 0    | 0     | 0     | 0     | 0     | 0     | 0     | 0     | 0     | 0     | 0     | 0     | 1                         | 0                      |
|                                        | <i>Scutulons</i> sp.                                   | 0   | 1   | 0   | 0   | 0    | 0     | 0     | 0     | 0     | 0     | 0     | 0     | 0     | 0     | 0     | 0     | 1                         | 0                      |
|                                        | <i>Stainforthia loeblichi</i> (Feyling-Hanssen)        | 1   | 1   | 0   | 0   | 0    | 1     | 1     | 0     | 0     | 1     | 0     | 0     | 0     | 0     | 0     | 0     | 5                         | 1                      |
|                                        | <i>Textularia earlandi</i> (Parker)                    | 0   | 0   | 1   | 0   | 0    | 0     | 0     | 0     | 0     | 0     | 0     | 0     | 0     | 0     | 0     | 0     | 1                         | 0                      |
| <i>Textularia sagittula</i> (Defrance) | 0                                                      | 0   | 0   | 0   | 0   | 0    | 0     | 0     | 0     | 0     | 0     | 0     | 0     | 0     | 0     | 0     | 0     | 0                         |                        |
| other species                          |                                                        | 0   | 0   | 1   | 1   | 0    | 1     | 0     | 1     | 0     | 0     | 0     | 0     | 0     | 0     | 0     | 0     | 4                         | 1                      |
|                                        | Total density per slice                                | 85  | 96  | 123 | 47  | 63   | 38    | 41    | 61    | 63    | 43    | 27    | 20    | 9     | 20    | 26    | 24    | 786                       | 100                    |

**Table S3: Relative abundance (%) of the main foraminiferal species of the Gullmar Fjord per zones defined by porewater nitrate modelling profiles. In the GF17-3 oxic station, three zones are delimited: the nitrification zone from 0 to 12 mm depth, the 1<sup>st</sup> denitrification zone from 12 to 35 mm depth and the 2<sup>nd</sup> denitrification zone from 35 to 50 mm depth, then the foraminiferal relative abundance of the total core from 0 to 50 mm depth. In the GF17-1 hypoxic station, one zone is delimited by the porewater nitrate modelling profile: the nitrification zone from 0 to 16 mm depth. Then, the rest of the core corresponded to the undetected nitrate zone from 16 to 50 mm depth. The foraminiferal sections are divided as: the invasive *Nonionella* sp. T1 species according to Polovodova Asteman and Schönfeld (2015) and Deldicq et al. (2019), the known denitrifying species in the GF according to Risgaard-Petersen et al. (2006) and Woehle et al. (2018), the non-denitrifying species according to Pina-Ochoa et al. (2010) and the minor other species of the fauna.**

| GF17-3A                          | Species                        | Relative percentage from 0-12 mm depth zone | Relative percentage from 12-35 mm depth zone | Relative percentage from 35-50 mm depth zone | Total Relative percentage from 0-50 mm depth zone |
|----------------------------------|--------------------------------|---------------------------------------------|----------------------------------------------|----------------------------------------------|---------------------------------------------------|
| invasive species                 | <i>Nonionella</i> sp.T1        | 18                                          | 27                                           | 60                                           | 34                                                |
| known denitrifying species in GF | <i>Globobulimina turgida</i>   | 0                                           | 0                                            | 0                                            | 0                                                 |
|                                  | <i>Globobulimina auricula</i>  | 0                                           | 0                                            | 0                                            | 0                                                 |
| candidate denitrifying species   | <i>Bolivina pseudopunctata</i> | 1                                           | 0                                            | 0                                            | 0                                                 |
|                                  | <i>Stainforthia fusiformis</i> | 2                                           | 1                                            | 0                                            | 1                                                 |
| non-denitrifying species         | <i>Bulimina marginata</i>      | 42                                          | 34                                           | 34                                           | 37                                                |
|                                  | <i>Cassidulina laevigata</i>   | 16                                          | 7                                            | 0                                            | 9                                                 |
|                                  | <i>Leptohalysis scotti</i>     | 6                                           | 25                                           | 5                                            | 11                                                |
| minor other species              | other species (<5%)            | 16                                          | 6                                            | 1                                            | 8                                                 |
|                                  | % by zone                      | 100                                         | 100                                          | 100                                          | 100                                               |
| GF17-3C                          | Species                        | Relative percentage from 0-12 mm depth zone | Relative percentage from 12-35 mm depth zone | Relative percentage from 35-50 mm depth zone | Total Relative percentage from 0-50 mm depth zone |
| invasive species                 | <i>Nonionella</i> sp.T1        | 50                                          | 78                                           | 98                                           | 74                                                |
| known denitrifying species in GF | <i>Globobulimina turgida</i>   | 0                                           | 0                                            | 0                                            | 0                                                 |
|                                  | <i>Globobulimina auricula</i>  | 0                                           | 0                                            | 0                                            | 0                                                 |
| candidate denitrifying species   | <i>Bolivina pseudopunctata</i> | 0                                           | 0                                            | 0                                            | 0                                                 |
|                                  | <i>Stainforthia fusiformis</i> | 1                                           | 0                                            | 0                                            | 1                                                 |
| non-denitrifying species         | <i>Bulimina marginata</i>      | 12                                          | 2                                            | 0                                            | 5                                                 |
|                                  | <i>Cassidulina laevigata</i>   | 13                                          | 2                                            | 0                                            | 5                                                 |
|                                  | <i>Leptohalysis scotti</i>     | 11                                          | 13                                           | 1                                            | 9                                                 |
| minor other species              | other species (<5%)            | 13                                          | 5                                            | 0                                            | 6                                                 |
|                                  | % by zone                      | 100                                         | 100                                          | 100                                          | 100                                               |



| GF17-1A                          | Species                         | Relative percentage from 0-16 mm depth zone | Relative percentage from 16-50 mm depth zone | Total average from 0-50 mm depth zone |
|----------------------------------|---------------------------------|---------------------------------------------|----------------------------------------------|---------------------------------------|
| invasive species                 | <i>Nonionella</i> sp.T1         | 2                                           | 15                                           | 5                                     |
| known denitrifying species in GF | <i>Globobulimina turgida</i>    | 0                                           | 0                                            | 0                                     |
|                                  | <i>Globobulimina auriculata</i> | 0                                           | 2                                            | 1                                     |
| candidate denitrifying species   | <i>Bolivina pseudopunctata</i>  | 0                                           | 0                                            | 0                                     |
|                                  | <i>Stainforthia fusiformis</i>  | 2                                           | 4                                            | 3                                     |
| non-denitrifying species         | <i>Bulimina marginata</i>       | 66                                          | 61                                           | 64                                    |
|                                  | <i>Cassidulina laevigata</i>    | 19                                          | 5                                            | 16                                    |
|                                  | <i>Leptohalysis scotti</i>      | 4                                           | 6                                            | 4                                     |
| minor other species              | other species (<5%)             | 7                                           | 7                                            | 6                                     |
|                                  | % by zone                       | 100                                         | 100                                          | 100                                   |
|                                  |                                 |                                             |                                              |                                       |
| GF17-1C                          | Species                         | Relative percentage from 0-16 mm depth zone | Relative percentage from 16-50 mm depth zone | Total average from 0-50 mm depth zone |
| invasive species                 | <i>Nonionella</i> sp.T1         | 0                                           | 0                                            | 1                                     |
| known denitrifying species in GF | <i>Globobulimina turgida</i>    | 0                                           | 0                                            | 0                                     |
|                                  | <i>Globobulimina auricula</i>   | 0                                           | 0                                            | 0                                     |
| candidate denitrifying species   | <i>Bolivina pseudopunctata</i>  | 3                                           | 1                                            | 2                                     |
|                                  | <i>Stainforthia fusiformis</i>  | 3                                           | 1                                            | 3                                     |
| non-denitrifying species         | <i>Bulimina marginata</i>       | 35                                          | 11                                           | 30                                    |
|                                  | <i>Cassidulina laevigata</i>    | 19                                          | 2                                            | 15                                    |
|                                  | <i>Leptohalysis scotti</i>      | 24                                          | 75                                           | 36                                    |
| minor other species              | other species (<5%)             | 13                                          | 10                                           | 14                                    |
|                                  | % by zone                       | 100                                         | 100                                          | 100                                   |

**Equation S2. Calculation example of the *Nonionella* sp. T1 denitrification rate ( $\text{nmol cm}^{-3} \text{d}^{-1}$ ) and the contributions (%) of *Nonionella* sp. T1 to nitrogen cycle (GF17-3A).**

Conversion of *Nonionella* sp. T1 denitrification rate in  $\text{nmol cm}^{-3} \text{s}^{-1}$

Corrected *Nonionella* sp. T1 denitrification rate =  $38 \text{ pmol ind}^{-1} \text{d}^{-1}$

$38 \text{ pmol ind}^{-1} \text{d}^{-1} / 1000 / 86400 = 4.4 \text{ nmol ind}^{-1} \text{s}^{-1}$

$4.4 \text{ nmol ind}^{-1} \text{ s}^{-1} * 841 \text{ (number of } Nonionella \text{ sp. T1) / (PI} * 25/4 \text{ (cross section area of the microtube))} = 1.90 \text{ E}^{-05} \text{ nmol cm}^{-3} \text{ s}^{-1}$

Contribution of *Nonionella* sp. T1 to benthic denitrification

Contribution A (%) = Foraminifera denitrification / Denitrification estimated by PROFILE from nitrate porewater.

Contribution A (%) from GF17-3A =  $(1.90 \text{ E}^{-05} \text{ nmol cm}^{-3} \text{ s}^{-1} * 100) / 4.07 \text{ E}^{-05} \text{ nmol cm}^{-3} \text{ s}^{-1}$  (sum of the two porewater denitrifying zones, Fig. 5 d, Table 1) = 47%.

Contribution B (%) = Foraminifera denitrification / (Foraminifera denitrification + Denitrification estimated by PROFILE from nitrate porewater).

Contribution B (%) from GF17-3A =  $(1.90 \text{ E}^{-05} \text{ nmol cm}^{-3} \text{ s}^{-1} * 100) / (1.90 \text{ E}^{-05} \text{ nmol cm}^{-3} \text{ s}^{-1} + 4.07 \text{ E}^{-05} \text{ nmol cm}^{-3} \text{ s}^{-1})$  sum of the two porewater denitrifying zones, Fig. 5 d, Table 1) = 32%.
